# Supplementary material
Source: PubMed Central journal article supplement (PMC5510674)
Supplement: Supp_Figure1.pdf [file Supp_Figure1.pdf]

## Supplementary Data

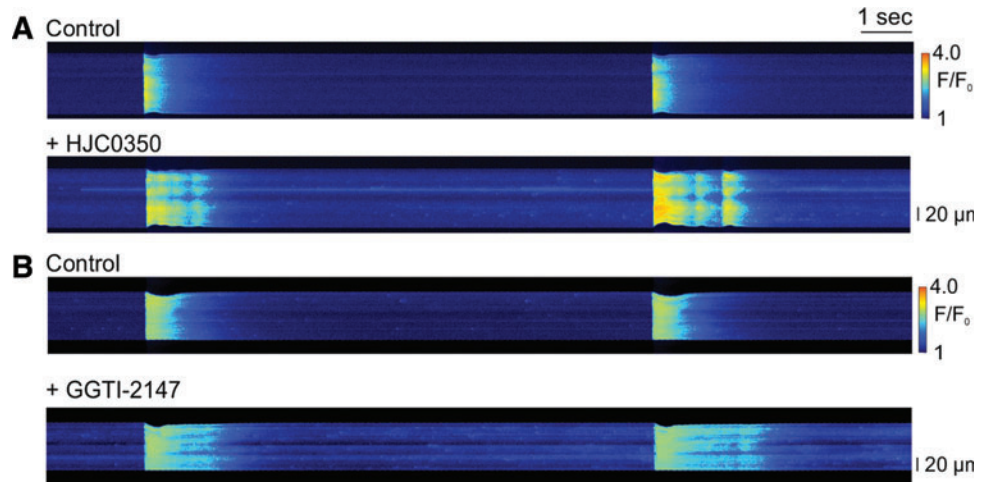

**SUPPLEMENTARY FIG. S1. Effects of HJC0350 and GGTI-2147 on the electrically stimulated  $[Ca^{2+}]_i$ .** (A) Typical effect of the Epac2 inhibitor, HJC0350 ( $10 \mu M$ ), on the electrically stimulated  $[Ca^{2+}]_i$  transient measured in fluo-4-loaded ARVMs. Similar results were obtained in four other cells. (B) Typical effect of the GGT-1 inhibitor, GGTI-2147 ( $5 \mu M$ ), on the  $[Ca^{2+}]_i$  transient. Similar results were obtained in four other cells.
