# Supplementary material
Source: PubMed Central journal article supplement (PMC5510674)
Supplement: Supp_Figure2.pdf [file Supp_Figure2.pdf]

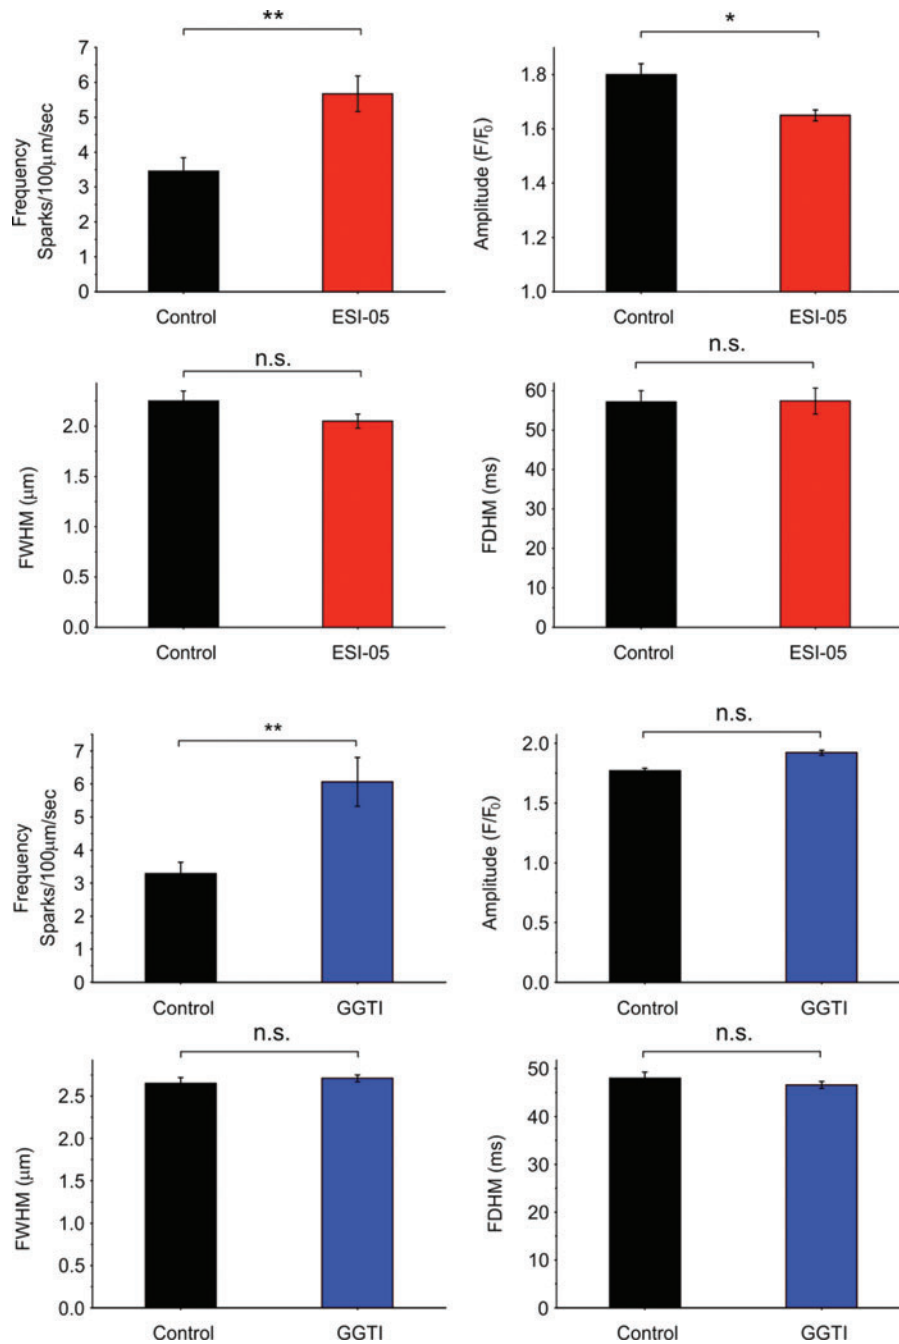

**SUPPLEMENTARY FIG. S2. Effects of ESI-05 and GGTI-298 on Ca<sup>2+</sup> spark properties.** (A) Effects of ESI-05 on the frequency, amplitude, width (full width at half maximum amplitude: FWHM), and duration (full duration at half maximum amplitude: FDHM) of spontaneous Ca<sup>2+</sup> sparks measured in fluo-4-loaded ARVMs ( $n = 30$ ). (B) Effects of GGTI-298 on the frequency, amplitude, width, and duration of spontaneous Ca<sup>2+</sup> sparks. Both ESI-05 and GGTI-298 caused a significant increase in Ca<sup>2+</sup> spark frequency ( $n = 26$ ). \* $p < 0.05$ , \*\* $p < 0.005$ , n.s., not significant.
