# Supplementary material
Source: PubMed Central journal article supplement (PMC5510674)
Supplement: Supp_Figure3.pdf [file Supp_Figure3.pdf]

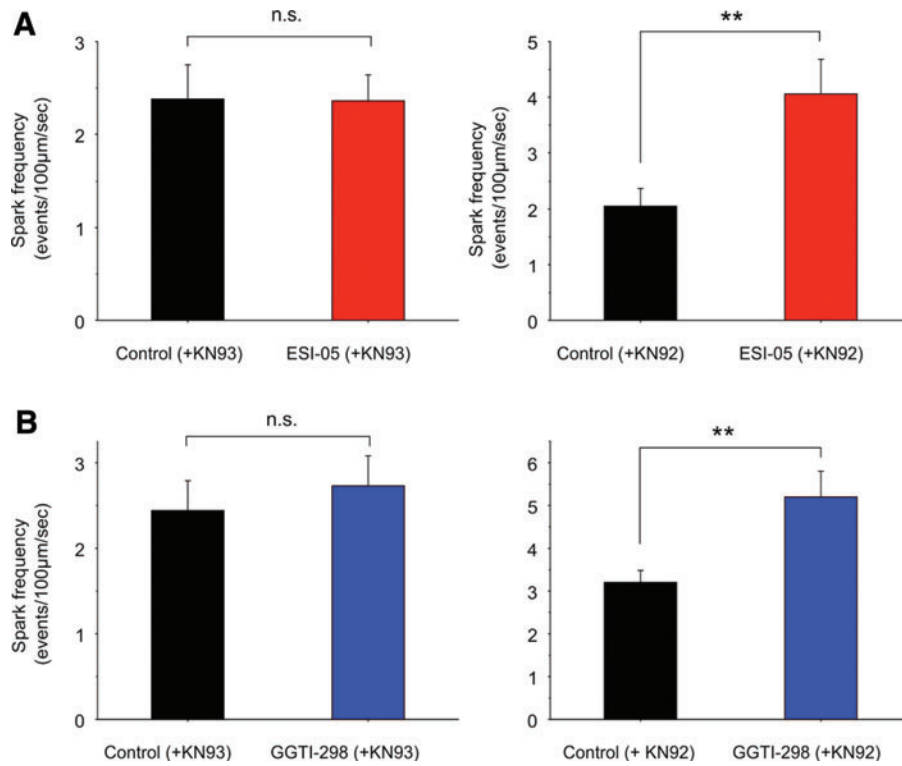

**SUPPLEMENTARY FIG. S3. KN93 inhibits the increase in spark frequency induced by ESI-05 or GGTI-298.** (A) Mean data showing that after preincubation (30 min) of ventricular myocytes with the CaMKII inhibitor, KN93 (1  $\mu$ M), ESI-05 did not cause a significant increase in  $\text{Ca}^{2+}$  spark frequency (*left*,  $n=49$ ,  $p < 0.01$ ). However, after preincubation with the control compound, KN92 (1  $\mu$ M), ESI-05 significantly increased  $\text{Ca}^{2+}$  spark frequency ( $n=45$ ,  $p < 0.01$ ). (B) Mean data showing that after preincubation with KN93 (1  $\mu$ M), introduction of GGTI-298 did not cause a significant increase in  $\text{Ca}^{2+}$  spark frequency (*left*,  $n=39$ ,  $p > 0.05$ ). In the presence of KN92 (*right*), GGTI-298 significantly increased spark frequency ( $n=26$ ,  $p < 0.05$ ). For each protocol, data were obtained from four hearts.  $**p < 0.01$ , n.s., not significant.
