# Supplementary material
Source: PubMed Central journal article supplement (PMC5510674)
Supplement: Supp_Figure4.pdf [file Supp_Figure4.pdf]

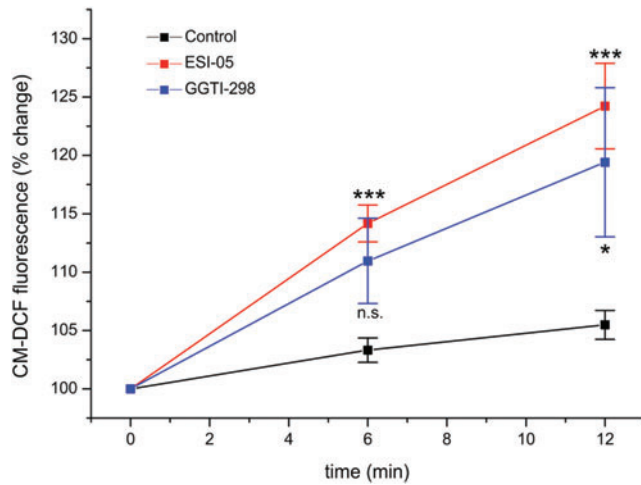

**SUPPLEMENTARY FIG. S4. Effects of ESI-05 and GGTI-298 on CM-DCF fluorescence.** Cumulative data showing the time-dependent change in CM-DCF fluorescence under control conditions or in the presence of ESI-05 or GGTI-298. In control cells, CM-DCF fluorescence increased slowly over time. This was significant at 12 min ( $p < 0.05$ ,  $n = 7$ ), but not at 6 min ( $p > 0.05$ ,  $n = 7$ ). In the presence of each drug, values significantly different to the corresponding time-dependent control are indicated. \* $p < 0.05$ , \*\*\* $p < 0.005$ , n.s., not significant,  $n = 7$  for each condition. For both drugs, the increase in CM-DCF fluorescence was significantly greater than the corresponding control after 12 min. There was no significant difference between the effects of ESI-05 or GGTI-298 at 6 or 12 min ( $p > 0.05$ ,  $n = 7$ ).
