# Supplementary material
Source: PubMed Central journal article supplement (PMC5510674)
Supplement: Supp_Figure5.pdf [file Supp_Figure5.pdf]

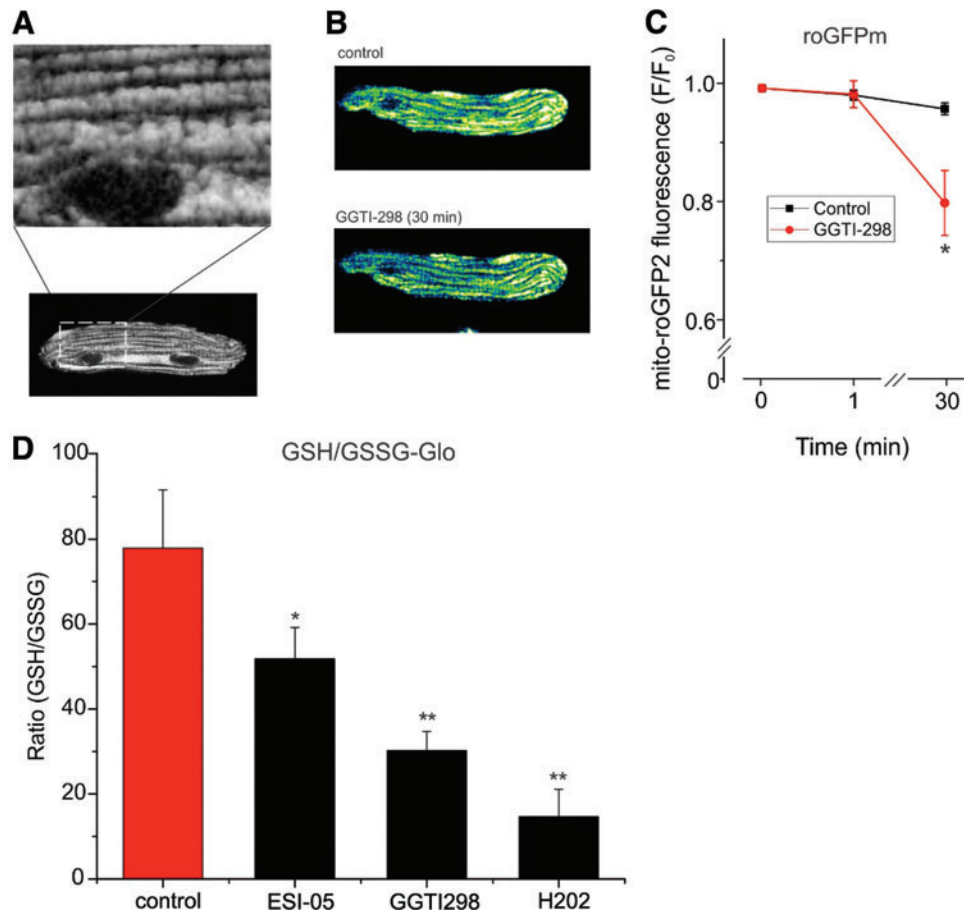

**SUPPLEMENTARY FIG. S5. Measurement of mito-roGFP fluorescence and GSH/GSSG ratio.** (A) Confocal image showing mito-roGFP fluorescence (488 ex.) of a ventricular myocyte cultured for 24 h. *Inset*, expanded section of cell area indicated by *white box*. (B) Decrease in mito-roGFP fluorescence after 30-min exposure to GGTI-298. (C) Cumulative mito-roGFP fluorescence data at time zero, 1, and 30 min under control conditions ( $n=6$ ) and in the presence of GGTI-298 ( $n=6$ ). The drug reached the cell  $\sim 1$  min after the time zero control measurement was taken. (D) Effect of ESI-05 ( $n=9$ ), GGTI-298 ( $n=8$ ), and  $H_2O_2$  ( $25 \mu M$ ) relative to the control ( $n=11$ ) GSH/GSSG ratio in aliquots of cells measured using the GSH/GSSG-Glo assay system. \*\* $p < 0.05$ , \* $p < 0.01$ .
