# Supplementary material
Source: PubMed Central journal article supplement (PMC5510674)
Supplement: Supp_Figure6.pdf [file Supp_Figure6.pdf]

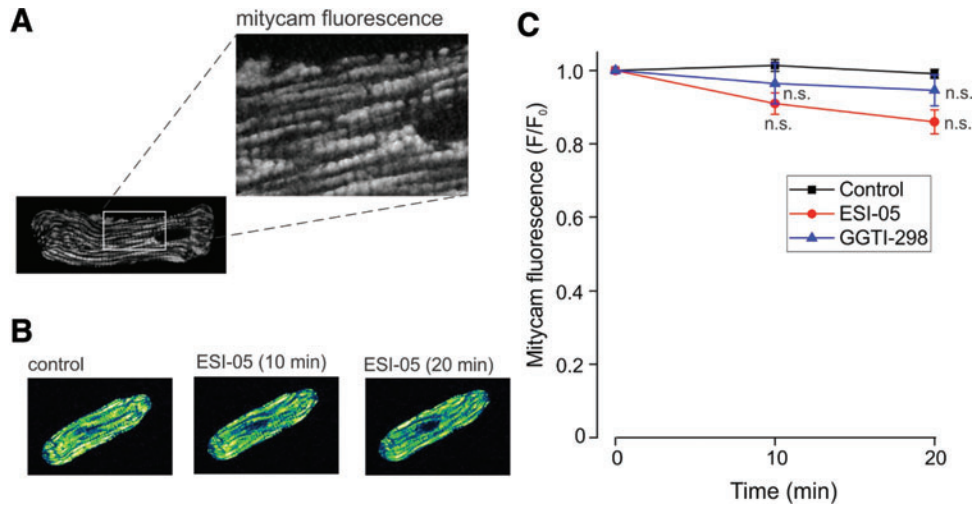

**SUPPLEMENTARY FIG. S6. Effects of drugs on mitycam fluorescence.** (A) Confocal image showing mitycam fluorescence (488 ex.) of a ventricular myocyte. *Inset*, expanded section of cell area indicated by *white box*. (B) Slight decrease in mitycam fluorescence after 10- or 20-min exposure to ESI-05 indicating a rise in  $[Ca^{2+}]$ . (C) Cumulative mitycam fluorescence data at time zero, 10, and 20 min, under control conditions ( $n=9$ ) and in the cultured presence of GGTI-298 ( $n=6$ ) or ESI-05 ( $n=6$ ). n.s. not significantly different from corresponding time control.
